# Supplementary material for: EcoEvo-MAPS: An Ecology and Evolution Assessment for Introductory through Advanced Undergraduates
Source: PubMed Central journal article supplement — CBE Life Sci Educ. 2018 Summer;17(2):ar18. doi: 10.1187/cbe.17-02-0037 (PMC5998322; doi:10.1187/cbe.17-02-0037), 2018
Supplement: cbe-17-ar18-s001.pdf [file cbe-17-ar18-s001.pdf]

# Supplemental Material

*CBE—Life Sciences Education*

Summers *et al.*

**SUPPLEMENTAL APPENDIX S1.** EcoEvo-MAPS question stems with likely/unlikely statements.

*Question 1.* In 1981, fishery managers introduced mysid shrimp to a Montana lake with the intention of increasing kokanee salmon production.

Below is a food web for this Montana lake *BEFORE* mysid shrimp were introduced. The arrows move from prey to predator. For example, zooplankton are eaten by lake whitefish and kokanee salmon.

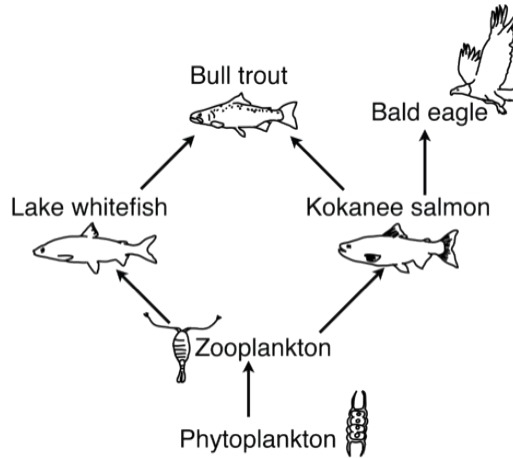

A few years after introduction of mysid shrimp to the Montana lake, fisheries managers found that:

- mysid shrimp consumed other zooplankton;
- these smaller zooplankton populations declined;
- and the kokanee salmon population disappeared.

Based on your knowledge about biology and this information, evaluate each statement as **Likely** or **Unlikely** to be true:

|                                                                                                                                                                                                | Likely                | Unlikely              |
|------------------------------------------------------------------------------------------------------------------------------------------------------------------------------------------------|-----------------------|-----------------------|
| 1) Bull trout directly prey upon lake whitefish, kokanee salmon, zooplankton, mysid shrimps, and phytoplankton.                                                                                | <input type="radio"/> | <input type="radio"/> |
| 2) Kokanee salmon population decline resulted from competition for food resources between mysid shrimp and kokanee salmon.                                                                     | <input type="radio"/> | <input type="radio"/> |
| 3) The only factor regulating the number of phytoplankton is predation by zooplankton.                                                                                                         | <input type="radio"/> | <input type="radio"/> |
| 4) If the amount of phytoplankton increases by one ton, a one ton increase in zooplankton is expected.                                                                                         | <input type="radio"/> | <input type="radio"/> |
| 5) A toxicant present in zooplankton that biomagnifies would be found at a higher concentration in lake whitefish than in bull trout.                                                          | <input type="radio"/> | <input type="radio"/> |
| 6) If phytoplankton in the pond are at carrying capacity, with phosphorous availability limiting growth, nitrogen run-off from a nearby agricultural field will increase phytoplankton growth. | <input type="radio"/> | <input type="radio"/> |
| 7) If regulations lead to an increase in bull trout, the lake whitefish and kokanee salmon populations will immediately increase in response.                                                  | <input type="radio"/> | <input type="radio"/> |

*Question 2.* The crustacean thorax is divided into segments. Segments may have appendages that are used for either movement or feeding.

Scientists investigated Ubx gene expression in four species of crustaceans with different numbers of movement and feeding appendages, as shown.

Gene expression was measured during early development. In the figure, the thoracic segments are colored:

- grey for Ubx gene expression, or
- white for no Ubx gene expression.

The evolutionary relationships among these four species of crustaceans are shown in the phylogenetic tree below.

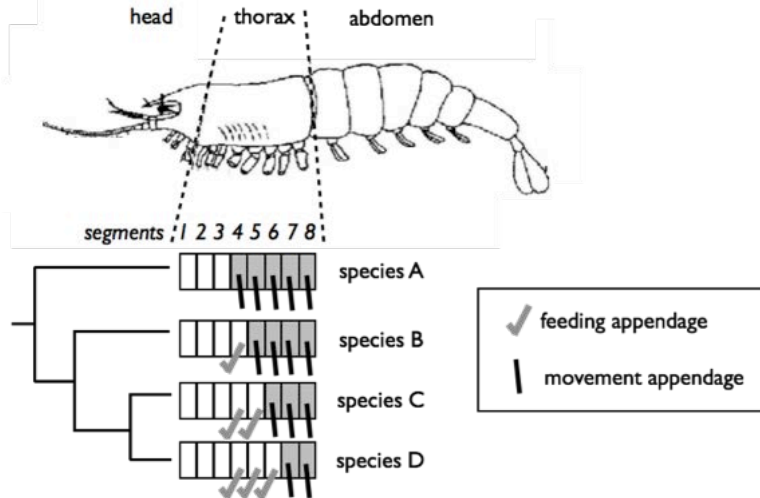

Based on this information and your knowledge about biology, evaluate each statement as **Likely** or **Unlikely** to be true:

|                                                                                                                                                                                                            | Likely                | Unlikely              |
|------------------------------------------------------------------------------------------------------------------------------------------------------------------------------------------------------------|-----------------------|-----------------------|
| 1) For an individual crustacean, segments that have different types of appendages have the same Ubx DNA sequences in their respective cells.                                                               | <input type="radio"/> | <input type="radio"/> |
| 2) Based on the relationships in the phylogenetic tree above, there is only one possible scenario for the evolution of feeding appendages - that first one, then two, then three feeding appendages arose. | <input type="radio"/> | <input type="radio"/> |
| 3) The phylogenetic tree provides support for three feeding appendages resulting in higher fitness than two feeding appendages.                                                                            | <input type="radio"/> | <input type="radio"/> |
| 4) All mutations that occur in an individual of species A will be passed down to its offspring.                                                                                                            | <input type="radio"/> | <input type="radio"/> |
| 5) The fact that over 90% of species D individuals have an elongated feeding appendage on segment 4 means that this trait must be controlled by a dominant allele.                                         | <input type="radio"/> | <input type="radio"/> |
| 6) Any mutation in the DNA sequence of the MSH gene, which only controls feeding appendage length, will impact feeding appendage length.                                                                   | <input type="radio"/> | <input type="radio"/> |
| 7) Natural selection results in generating, not eliminating, new phenotypes in these crustaceans.                                                                                                          | <input type="radio"/> | <input type="radio"/> |
| 8) More information is required to determine if the difference in number of feeding appendages between species C and D are adaptations.                                                                    | <input type="radio"/> | <input type="radio"/> |
| 9) A federal limit on the total amount of crustaceans harvested will equally protect all of these species.                                                                                                 | <input type="radio"/> | <input type="radio"/> |

Question 3. Scientists place the same number of bacteria A and virus phage Z, which infects the bacteria, into two different flasks. Each flask contains the same sterile growth medium which is replenished. They then observe the density of bacteria and viruses over 12 days, shown in the graphs below.

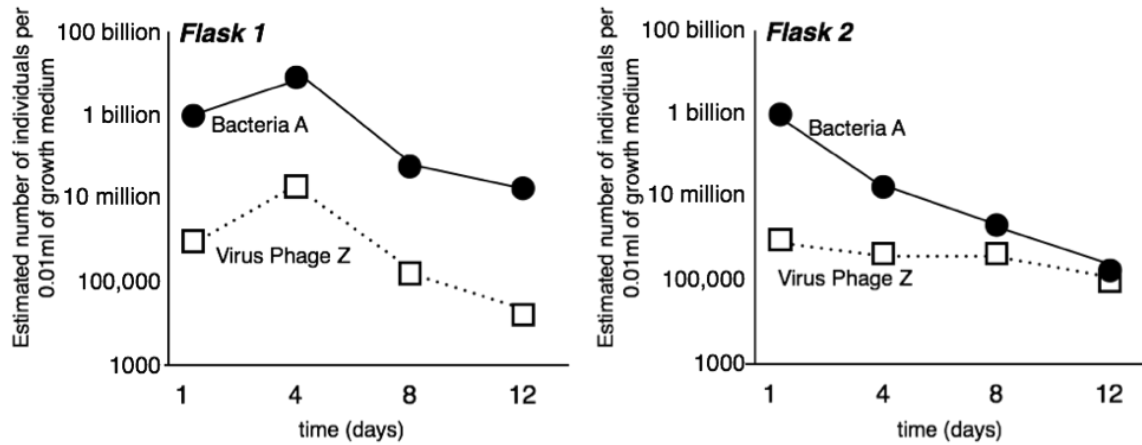

Based on your knowledge about biology and this information, evaluate each statement as **Likely** or **Unlikely** to be true:

|                                                                                                                                                                         | Likely                | Unlikely              |
|-------------------------------------------------------------------------------------------------------------------------------------------------------------------------|-----------------------|-----------------------|
| 1) On day 4, there is more competition among bacteria A in flask 1 than in flask 2.                                                                                     | <input type="radio"/> | <input type="radio"/> |
| 2) More information is needed in order to calculate the density of bacteria at eight days in each flask.                                                                | <input type="radio"/> | <input type="radio"/> |
| 3) The rate of bacterial population growth declines in flask 1 because organisms limit their consumption and growth to leave resources for the next generation.         | <input type="radio"/> | <input type="radio"/> |
| 4) The bacterial populations can go locally extinct due to infection by the virus in one of these flasks, even though that would result in the extinction of the virus. | <input type="radio"/> | <input type="radio"/> |
| 5) Bacteria placed in a separate flask with no virus and unlimited food will grow linearly.                                                                             | <input type="radio"/> | <input type="radio"/> |

Question 4. The following graph shows the diversity of three important groups of marine animals over the past 500 million years.

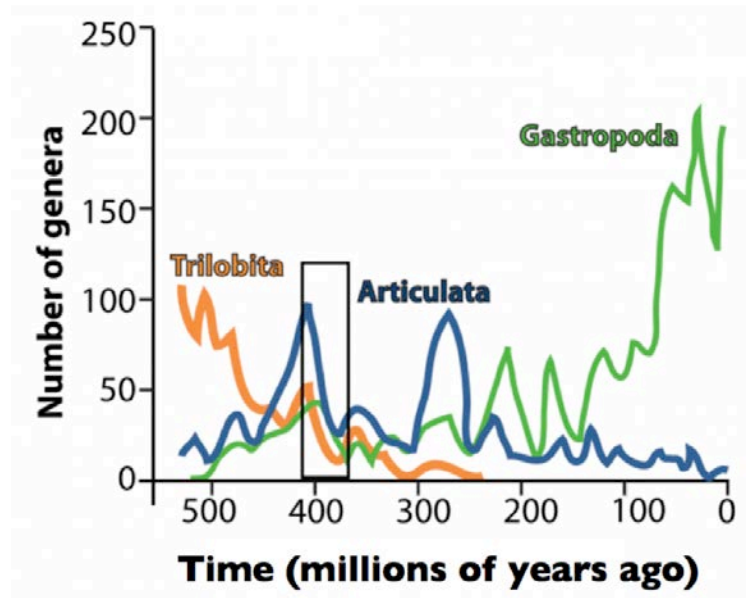

Based on your knowledge about biology and this information, evaluate each statement as **Likely** or **Unlikely** to be true:

|                                                                                                                      | Likely                | Unlikely              |
|----------------------------------------------------------------------------------------------------------------------|-----------------------|-----------------------|
| 1) If the number of species were graphed instead, the numbers on the y-axis would be smaller.                        | <input type="radio"/> | <input type="radio"/> |
| 2) This graph provides evidence for a mass extinction event in the period of time shown in the box.                  | <input type="radio"/> | <input type="radio"/> |
| 3) There are more fossils of extinct gastropods with hard shells than extinct soft bodied gastropods without shells. | <input type="radio"/> | <input type="radio"/> |
| 4) The majority of Trilobita, Articulata, and Gastropoda that ever lived are now extinct.                            | <input type="radio"/> | <input type="radio"/> |
| 5) Articulata, Gastropoda, and Trilobita species share a common ancestor.                                            | <input type="radio"/> | <input type="radio"/> |
| 6) Trilobita species share a common ancestor.                                                                        | <input type="radio"/> | <input type="radio"/> |
| 7) Humans have caused the majority of total animal extinctions.                                                      | <input type="radio"/> | <input type="radio"/> |

*Question 5.* Tortoises inhabit a series of volcanic islands off of the coast of South America. Biologists have identified geographically confined populations of tortoises on these islands, shown below. There is strong evidence that tortoises from one population do not naturally reproduce with tortoises from any other population.

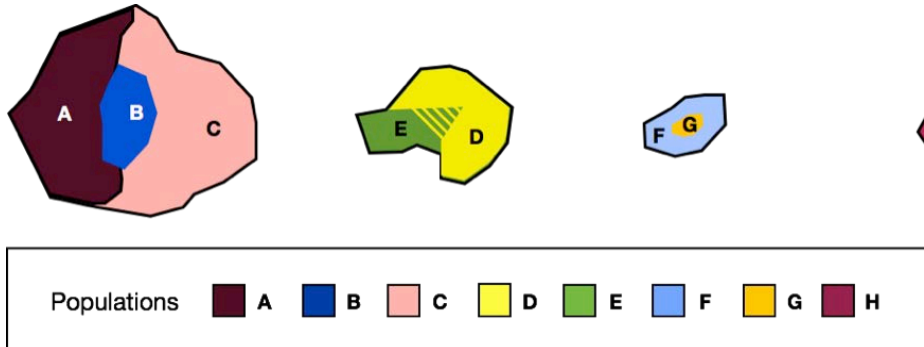

Based on your knowledge about biology and this information, evaluate each statement as **Likely** or **Unlikely** to be true:

|                                                                                                                                                                                                                                | Likely                | Unlikely              |
|--------------------------------------------------------------------------------------------------------------------------------------------------------------------------------------------------------------------------------|-----------------------|-----------------------|
| 1) Two tortoises from population H have identical genomes.                                                                                                                                                                     | <input type="radio"/> | <input type="radio"/> |
| 2) Past and present genetic drift has increased the number of alleles in population G.                                                                                                                                         | <input type="radio"/> | <input type="radio"/> |
| 3) Considering only this generation, a tortoise that lived to 100 and had 10 surviving offspring had equal fitness as a tortoise that lived to 30 and had 10 surviving offspring.                                              | <input type="radio"/> | <input type="radio"/> |
| 4) The temperature at which the eggs incubate determines the sex of these tortoises; therefore, DNA sequence variation from one tortoise to the next is the primary explanation for differences in sex.                        | <input type="radio"/> | <input type="radio"/> |
| 5) Conservation biologists can count tortoise hatchlings and estimate hatch rates for population E. This information alone allows prediction of how much the population will increase in size.                                 | <input type="radio"/> | <input type="radio"/> |
| 6) A tortoise is exposed to a high dose of radiation and develops a mutation in the DNA of a single skin cell. If the tortoise then goes on to have four offspring, at least one of these offspring will inherit the mutation. | <input type="radio"/> | <input type="radio"/> |
| 7) When conservation biologists inseminated tortoises from population C with sperm from population G, the influence of genetic drift in population C increased.                                                                | <input type="radio"/> | <input type="radio"/> |

*Question 6.* The phylogenetic trees below are based on DNA sequence data. They show the number of color receptors for seven different species.

In general, the visual system of most reptiles, for example crocodiles, include four types of color receptors. Mammals in general possess two types of color receptors, however primates, including orangutans, chimpanzees, and humans, have three types of color receptors.

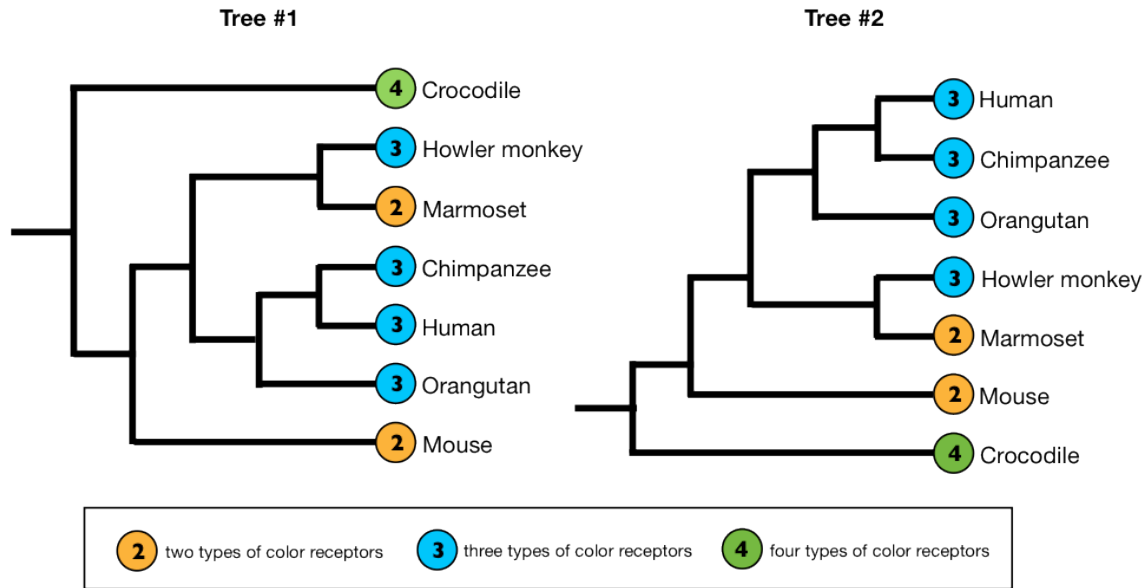

Based on your knowledge about biology and this information, evaluate each statement as **Likely** or **Unlikely** to be true:

|                                                                                                                                                                                                                                                                                                   | Likely                | Unlikely              |
|---------------------------------------------------------------------------------------------------------------------------------------------------------------------------------------------------------------------------------------------------------------------------------------------------|-----------------------|-----------------------|
| 1) Tree # 2 shows orangutans more closely related to chimpanzees than to humans.                                                                                                                                                                                                                  | <input type="radio"/> | <input type="radio"/> |
| 2) Tree #2 shows that marmosets evolved from mice.                                                                                                                                                                                                                                                | <input type="radio"/> | <input type="radio"/> |
| 3) Tree #2 shows marmosets and howler monkeys sharing a more recent common ancestor than orangutans and howler monkeys.                                                                                                                                                                           | <input type="radio"/> | <input type="radio"/> |
| 4) The most recent common ancestor of chimpanzees and humans possessed two, but not three, color receptors.                                                                                                                                                                                       | <input type="radio"/> | <input type="radio"/> |
| 5) The phylogenetic relationships shown in Tree #1 are the same as the phylogenetic relationships shown in Tree #2.                                                                                                                                                                               | <input type="radio"/> | <input type="radio"/> |
| 6) In a population of 100 orangutans, all individuals will reproduce and contribute genetic information to the next generation.                                                                                                                                                                   | <input type="radio"/> | <input type="radio"/> |
| 7) In a population of orangutans, 1 in 3000 (0.03%) births have a recessive phenotype affecting vision. Assuming that there are only two alleles for this trait (one dominant and one recessive), the percentage of carriers in this population is less than or equal to 0.03% of the population. | <input type="radio"/> | <input type="radio"/> |

*Question 7.* Hydrothermal vents are locations in the deep sea where water heated below the seafloor exits. While most of the deep sea is around 2°C, vent water has been measured at over 400°C. These vents occur along plate boundaries and can be separated from each other by thousands of kilometers. Chemicals dissolved in this water provide the main energy source to communities of organisms that live near hydrothermal vents.

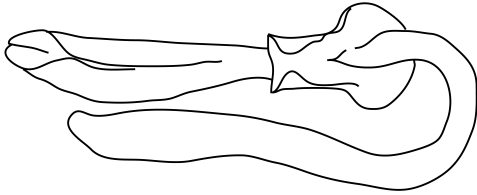

The figure above shows an annelid worm that lives at deep-sea hydrothermal vents. This worm lacks a gut and has an organ that contains intracellular bacteria. These bacteria metabolize hydrogen sulfide for the production of simple sugars in a process called chemosynthesis. An example of this process is written below:

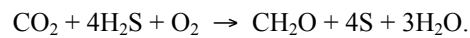

Based on your knowledge about biology and this information, evaluate each statement as **Likely** or **Unlikely** to be true:

|                                                                                                                                                                                              | Likely                | Unlikely              |
|----------------------------------------------------------------------------------------------------------------------------------------------------------------------------------------------|-----------------------|-----------------------|
| 1) Along the spectrum of symbiotic relationships, the association between this worm and the bacteria is closer to mutualism than parasitism.                                                 | <input type="radio"/> | <input type="radio"/> |
| 2) Carbon dioxide is a direct source of energy in photosynthetic and chemosynthetic systems.                                                                                                 | <input type="radio"/> | <input type="radio"/> |
| 3) Without chemosynthetic organisms, the energy from the hydrothermal vents would be accessible to other organisms.                                                                          | <input type="radio"/> | <input type="radio"/> |
| 4) Gene flow resulting from larvae dispersing between hydrothermal vents can act against local adaptation.                                                                                   | <input type="radio"/> | <input type="radio"/> |
| 5) Gene flow between worm populations found at one vent and another vent is evidence for these worms being the same species.                                                                 | <input type="radio"/> | <input type="radio"/> |
| 6) A new allele appearing in an isolated population of these worms is evidence for genetic drift.                                                                                            | <input type="radio"/> | <input type="radio"/> |
| 7) Some species of deep-sea worms care for their young while others do not. For those that care for young, the survivorship of offspring is greater, but the number of offspring is smaller. | <input type="radio"/> | <input type="radio"/> |



Question 8. The two maps below show the average temperature and yearly rainfall at varying latitudes. Locations of interest are marked A-D.

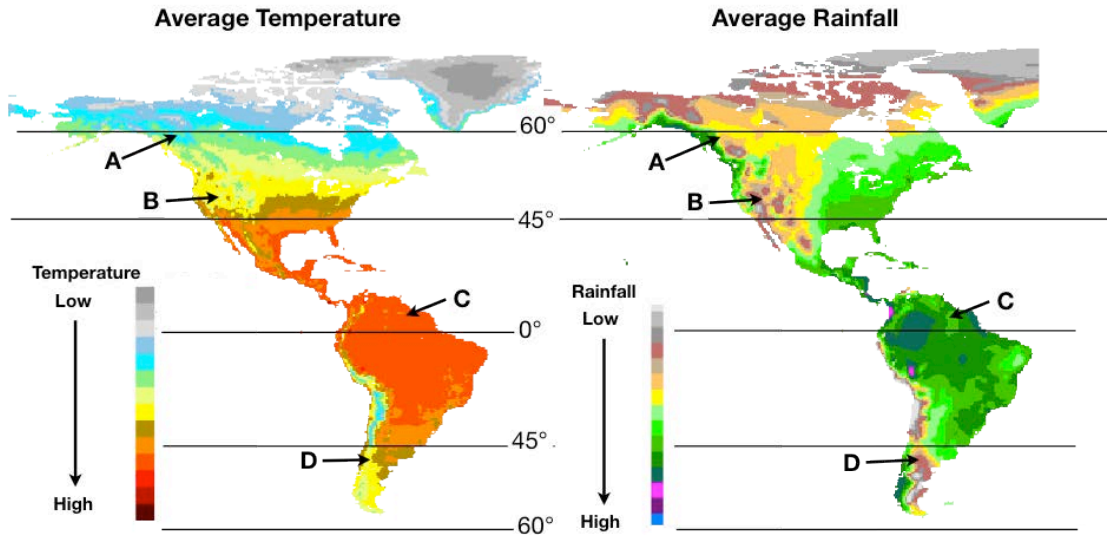

Based on your knowledge about biology and this information, evaluate each statement as **Likely** or **Unlikely** to be true:

|                                                                                                                                   | Likely                | Unlikely              |
|-----------------------------------------------------------------------------------------------------------------------------------|-----------------------|-----------------------|
| 1) Climates are more similar at B and D than at A and B.                                                                          | <input type="radio"/> | <input type="radio"/> |
| 2) Yearly primary productivity is higher at A than C.                                                                             | <input type="radio"/> | <input type="radio"/> |
| 3) Total species diversity is higher at C than at D.                                                                              | <input type="radio"/> | <input type="radio"/> |
| 4) Plant species have more similar phenotypes at B and D than at C and D.                                                         | <input type="radio"/> | <input type="radio"/> |
| 5) Primary productivity varies more over the course of a year at A than at C.                                                     | <input type="radio"/> | <input type="radio"/> |
| 6) Mass deforestation at C affects the global climate.                                                                            | <input type="radio"/> | <input type="radio"/> |
| 7) If fertilizers are applied to agricultural plants at site D, these fertilizers are a direct source of energy for plant growth. | <input type="radio"/> | <input type="radio"/> |

*Question 9.* Biologists removed all of the plants and soil in 20 x 20 m<sup>2</sup> plots in a Florida wetland. For 15 years, scientists measured the percent coverage of various plant species in these plots. The results of a single plot are shown in the graph below.

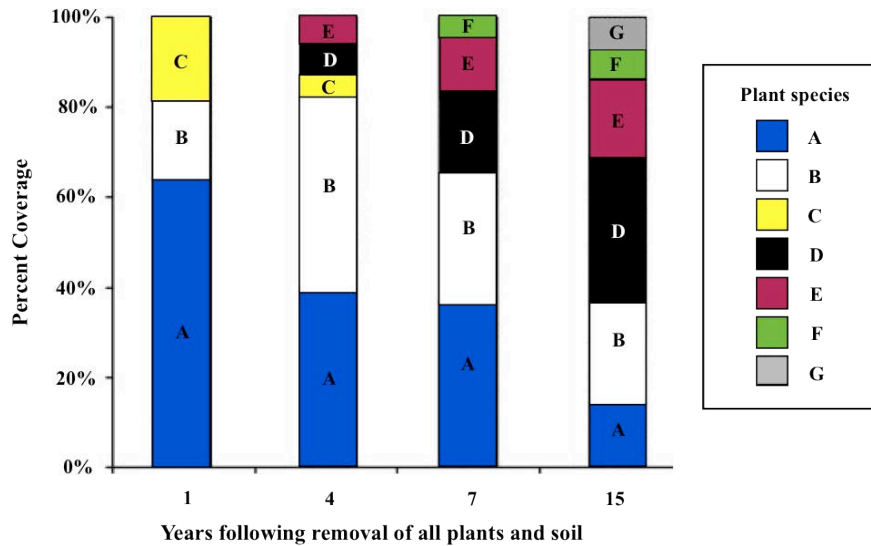

Based on your knowledge about biology and this information, evaluate each statement as **Likely** or **Unlikely** to be true:

|                                                                                                                                                    | Likely                | Unlikely              |
|----------------------------------------------------------------------------------------------------------------------------------------------------|-----------------------|-----------------------|
| 1) The total number of plant species increased over the 15 years.                                                                                  | <input type="radio"/> | <input type="radio"/> |
| 2) Plants that colonized the plot in year 15 are better competitors for space and resources than plants that colonized the barren plots in year 1. | <input type="radio"/> | <input type="radio"/> |
| 3) Chloroplasts found in these plants arose from an endosymbiotic relationship.                                                                    | <input type="radio"/> | <input type="radio"/> |
| 4) Carbon in the soil is directly incorporated into the tissues of these plants.                                                                   | <input type="radio"/> | <input type="radio"/> |
| 5) Soil erosion in these plots removes carbon from the global carbon cycle.                                                                        | <input type="radio"/> | <input type="radio"/> |
| 6) Decomposition is important to this ecosystem because it directly provides nutrients, but not energy, to plants.                                 | <input type="radio"/> | <input type="radio"/> |
| 7) Fungi in these plots destroy atoms of plants during the decay process.                                                                          | <input type="radio"/> | <input type="radio"/> |

**SUPPLEMENTAL APPENDIX S2.** Example of student recruitment.

*Verbal introduction to students:*

“On [day], I will email you a link to take a survey on fundamental concepts in biology. This survey is important because it will help our department improve our undergraduate curriculum. The survey contains nine questions and should take roughly 15-35 minutes to complete. Your answers will not be graded, but you will receive [some participation points] for completing the survey. Once I send the email, you will have until [one week later] to complete the online survey.

Please give your best effort so that the resulting data fully represents the deep knowledge of biology that you have worked so hard to develop. I also ask that you take the survey without consulting outside information.”

*Email to students:*

Dear [CLASS],

Here is the link to the biology survey that I mentioned in class. This survey is intended to help departments nationwide improve their undergraduate curricula. The survey contains nine questions and should take roughly 15-35 minutes to complete. Your answers will not be graded, but you will receive [some participation points] for completing the survey. I ask you to give your best effort so that the resulting data fully represents the deep knowledge of biology that you have worked so hard to develop. I also ask that you take the survey without consulting outside information.

Please follow the link below to access the questionnaire, which will remain posted until [one week later].

[link to Qualtrics survey]

Thank you in advance for your participation.

[YOUR NAME]

### SUPPLEMENTAL APPENDIX S3. Student demographic questionnaire.

Note: You may choose to leave any or all of these questions blank. Your answers will be used to better understand characteristics of students taking this survey.

Are you 18 years of age or older?

- Yes  
 No

What is your current class standing?

- First-year  
 Sophomore  
 Junior  
 Senior  
 Postbaccalaureate  
 Graduate student  
 Other: \_\_\_\_\_

Are you a Transfer Student?

- Yes  
 No

If you are a transfer student, what other types of institutions have you attended? (select all that apply)

- Two-year college or community college  
 Four-year college or university  
 Other: \_\_\_\_\_  
 Does not apply

If you are a transfer student, where have you taken introductory biology courses? (select all that apply)

- My current institution  
 A different two year college or community college  
 A different four-year college or university  
 Other: \_\_\_\_\_  
 Does not apply

Did you take AP biology in high school?

- Yes  
 No

[If yes] What was your score on the AP biology exam?

- 1  
 2  
 3  
 4  
 5  
 Not sure  
 Did not take the AP biology exam

Approximately how many college-level **biology** courses have you taken, including any in which you are currently enrolled?

\_\_\_\_\_ [enter number]

Have you declared or are you planning to declare a major in biology or another life science?

- Yes  
 No

Please check the sub discipline(s) of biology in which you have taken the most courses.

- Biochemistry  
 Molecular/Cell Biology  
 Physiology  
 Neuroscience  
 Ecology  
 Evolution  
 No specialization/equal exposure

What is your approximate current overall G.P.A.?

- 0.0 – 0.69 (E or F)  
 0.7 – 1.69 (D- to D+)  
 1.7 – 2.69 (C- to C+)  
 2.7 – 3.69 (B- to B+)  
 3.7 – 4.00 (A- to A+)

Gender:

- Female  
 Male  
 Other

Ethnicity (select all that apply):

- African American/Black  
 Asian/Asian American  
 Caucasian/White  
 Filipino  
 Hispanic/Latino  
 Native American/Alaska Native  
 Native Hawaiian  
 Pacific Islander  
 Other: \_\_\_\_\_

Did you speak English at home when you were growing up?

- Yes  
 No

[If no] What language did you speak at home? \_\_\_\_\_

Was English the primary language of instruction in your high school?

- Yes  
 No

Highest level of education completed by at least one of your parent(s):

- Did not complete high school  
 High school/GED  
 Some college (but did not complete college)  
 Associate's degree (2-year degree)  
 Bachelor's degree  
 Master's degree  
 Advanced graduate degree (for example, DVM, MD, PhD)  
 Not sure

**SUPPLEMENTAL APPENDIX S4.** Item response theory (IRT) model comparison and fit statistics.

**Model comparisons**

| <b>Model</b>                      | <b>AIC</b> | <b>BIC</b> | <b>Log Likelihood</b> | <b>X<sup>2</sup> compared to 3PL</b> | <b>Degrees of freedom</b> | <b>p-value</b> |
|-----------------------------------|------------|------------|-----------------------|--------------------------------------|---------------------------|----------------|
| 1PL                               | 162930     | 163293     | -81401                | 2725.7                               | 125                       | 0              |
| 2PL                               | 161061     | 161776     | -80405                | 733.2                                | 63                        | 0              |
| 3PL                               | 160454     | 161526     | -80038                | -                                    | -                         | -              |
| 3PL – multi<br>(VC core concepts) | 163269     | 164340     | -81446                | 2815.1                               | 0                         | 0              |
| 3PL – multi<br>(Eco/Evo themes)   | 163965     | 165036     | -81793                | 3510.7                               | 0                         | 0              |

**M2 fit statistics of 3PL model**

| <b>M2</b> | <b>df</b> | <b>p</b> | <b>RMSEA (5-95)</b>    | <b>SRMSR</b> | <b>TLI</b> | <b>CFI</b> |
|-----------|-----------|----------|------------------------|--------------|------------|------------|
| 4381.05   | 1827      | 0        | 0.0256 (0.0246-0.0265) | 0.033        | 0.859      | 0.868      |

**SUPPLEMENTAL APPENDIX S5.**

**Correlation between overall student scores reported as percent correct (classical test theory) and 3PL IRT thetas.  $r=0.92$ .**

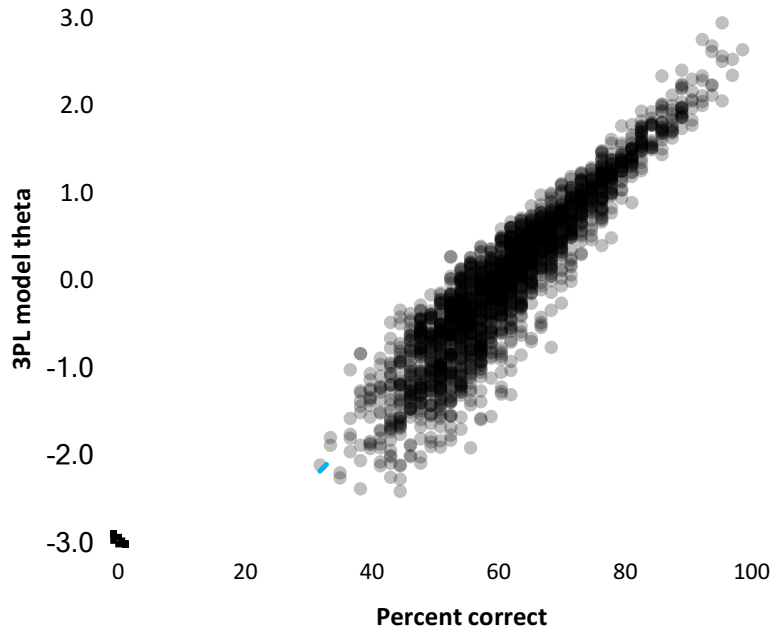

**Correlation between statement difficulty estimated based on percent correct (classical test theory) and 3PL model.  $r=0.76$ .**

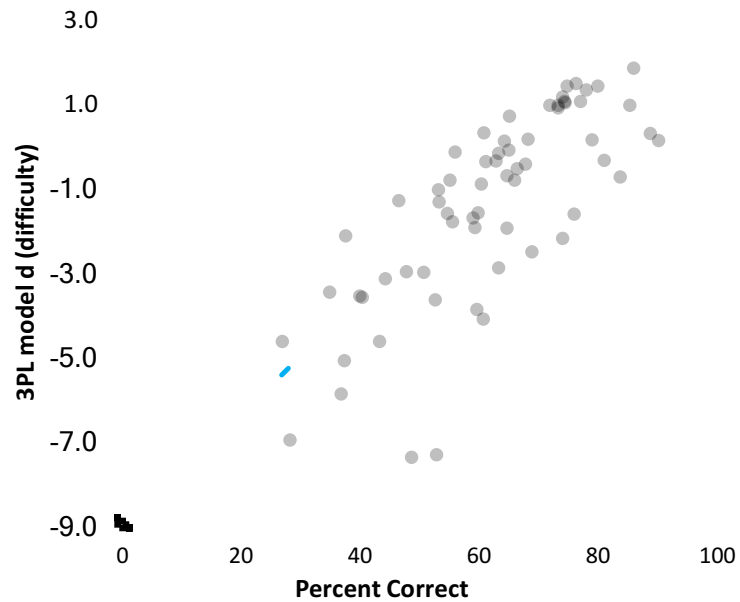

**SUPPLEMENTAL APPENDIX S6.** Three-parameter logistic model item response theory (3PL IRT) single item analysis.

**Single item fit statistics of 3PL model**

Pearson’s Chi Square ( $S-\chi^2$ ) fit statistic (Orlando & Thissen, 2000), degrees of freedom (df), and significance (p). The null hypothesis is that the statement fits well; a significant result ( $p < 0.05$ ) indicates poor statement fit. The six items with poor fit are indicated with bold italics – 1\_5, 2\_9, 4\_4, 4\_5, 7\_5, and 8\_7.

| Statement* | Pearson’s Chi Square ( $S-\chi^2$ ) | $S-\chi^2$ df | $S-\chi^2$ p | Statement* | Pearson’s Chi Square ( $S-\chi^2$ ) | $S-\chi^2$ df | $S-\chi^2$ p |
|------------|-------------------------------------|---------------|--------------|------------|-------------------------------------|---------------|--------------|
| 1_1        | 26.646                              | 25            | 0.374        | 5_5        | 27.583                              | 32            | 0.690        |
| 1_2        | 29.678                              | 33            | 0.633        | 5_6        | 31.635                              | 28            | 0.290        |
| 1_3        | 24.695                              | 32            | 0.818        | 5_7        | 35.829                              | 34            | 0.383        |
| 1_4        | 35.631                              | 31            | 0.259        | 6_1        | 31.777                              | 27            | 0.240        |
| <b>1_5</b> | <b>47.070</b>                       | <b>32</b>     | <b>0.042</b> | 6_2        | 38.641                              | 30            | 0.134        |
| 1_6        | 21.531                              | 33            | 0.938        | 6_3        | 21.983                              | 27            | 0.738        |
| 1_7        | 37.858                              | 27            | 0.080        | 6_4        | 33.550                              | 29            | 0.256        |
| 2_1        | 43.598                              | 36            | 0.180        | 6_5        | 34.992                              | 31            | 0.284        |
| 2_2        | 33.075                              | 35            | 0.561        | 6_6        | 20.494                              | 28            | 0.846        |
| 2_3        | 29.910                              | 31            | 0.522        | 6_7        | 28.588                              | 32            | 0.640        |
| 2_4        | 34.526                              | 33            | 0.395        | 7_1        | 20.383                              | 25            | 0.726        |
| 2_5        | 44.346                              | 34            | 0.110        | 7_2        | 28.589                              | 34            | 0.730        |
| 2_6        | 29.295                              | 34            | 0.698        | 7_3        | 39.628                              | 31            | 0.138        |
| 2_7        | 25.151                              | 33            | 0.834        | 7_4        | 22.475                              | 36            | 0.962        |
| 2_8        | 27.654                              | 33            | 0.730        | <b>7_5</b> | <b>47.578</b>                       | <b>33</b>     | <b>0.048</b> |
| <b>2_9</b> | <b>58.026</b>                       | <b>33</b>     | <b>0.005</b> | 7_6        | 25.050                              | 34            | 0.868        |
| 3_1        | 27.182                              | 36            | 0.855        | 7_7        | 13.092                              | 28            | 0.992        |
| 3_2        | 20.043                              | 33            | 0.963        | 8_1        | 23.207                              | 27            | 0.674        |
| 3_3        | 31.221                              | 31            | 0.455        | 8_2        | 38.060                              | 30            | 0.148        |
| 3_4        | 30.999                              | 34            | 0.616        | 8_3        | 39.437                              | 33            | 0.204        |
| 3_5        | 22.371                              | 31            | 0.871        | 8_4        | 46.963                              | 33            | 0.055        |
| 4_1        | 42.290                              | 33            | 0.129        | 8_5        | 38.538                              | 33            | 0.233        |
| 4_2        | 32.811                              | 31            | 0.378        | 8_6        | 28.193                              | 28            | 0.454        |
| 4_3        | 33.127                              | 33            | 0.461        | <b>8_7</b> | <b>54.973</b>                       | <b>32</b>     | <b>0.007</b> |
| <b>4_4</b> | <b>48.906</b>                       | <b>33</b>     | <b>0.037</b> | 9_1        | 27.829                              | 30            | 0.579        |
| <b>4_5</b> | <b>57.289</b>                       | <b>33</b>     | <b>0.005</b> | 9_2        | 36.803                              | 34            | 0.340        |
| 4_6        | 24.322                              | 26            | 0.558        | 9_3        | 28.182                              | 32            | 0.660        |
| 4_7        | 34.095                              | 31            | 0.321        | 9_4        | 43.020                              | 32            | 0.092        |
| 5_1        | 42.757                              | 32            | 0.097        | 9_5        | 41.733                              | 33            | 0.142        |
| 5_2        | 33.166                              | 34            | 0.508        | 9_6        | 25.711                              | 31            | 0.735        |
| 5_3        | 43.459                              | 34            | 0.128        | 9_7        | 36.124                              | 31            | 0.241        |
| 5_4        | 35.027                              | 33            | 0.372        |            |                                     |               |              |

\*The first number refers to the question and the second to the statement (e.g., “1\_1” is question 1, statement 1).

Orlando, M., & Thissen, D. (2000). Likelihood-based item-fit indices for dichotomous item response theory models. *Applied Psychological Measurement, 24*(1), 50-64. doi: 10.1177/01466216000241003



## Test characteristic curve and item trace lines for 3PL model

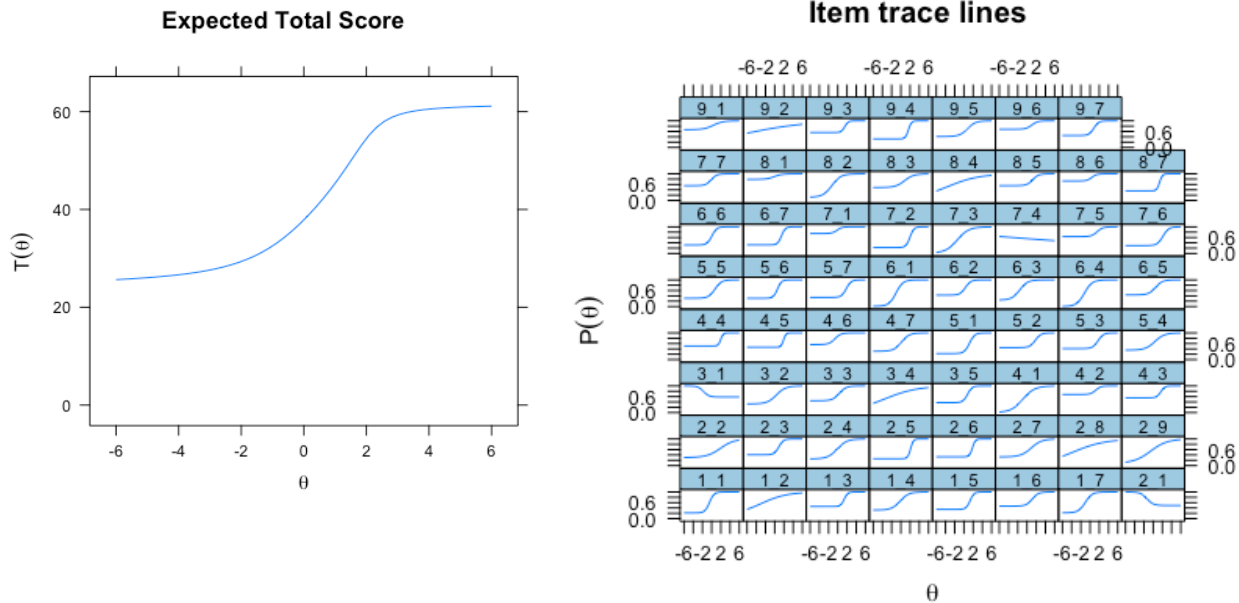

### Rationale for including statements with negative IRT slopes

Three statements with negative slopes (2\_1, 3\_1, and 7\_4) are included in the assessment because:

- 1) faculty reviewers stated they were testing important concepts where students often have conceptual difficulties (e.g., gene expression, intraspecific competition, and gene flow);
- 2) results from student interviews also indicate that students who answered incorrectly also did not have sound reasoning (see table below); and
- 3) the overall score estimates for students with or without these three statements were strongly correlated (Pearson's  $r > 0.99$ ), regardless of whether student ability was calculated using IRT thetas or classical test statistics.

|           | No. student interviews where students answered: |                                    |                                  |                                      |
|-----------|-------------------------------------------------|------------------------------------|----------------------------------|--------------------------------------|
| Statement | Correctly with sound reasoning                  | Correctly with not sound reasoning | Incorrectly with sound reasoning | Incorrectly with not sound reasoning |
| 2_1       | 9                                               | 1                                  | 0                                | 19                                   |
| 3_1       | 5                                               | 0                                  | 0                                | 10                                   |
| 7_4       | 10                                              | 5                                  | 0                                | 13                                   |

**SUPPLEMENTAL FIGURE S1.** Frequency distribution of overall student scores for the final version of EcoEvo-MAPS. N=2142 students.

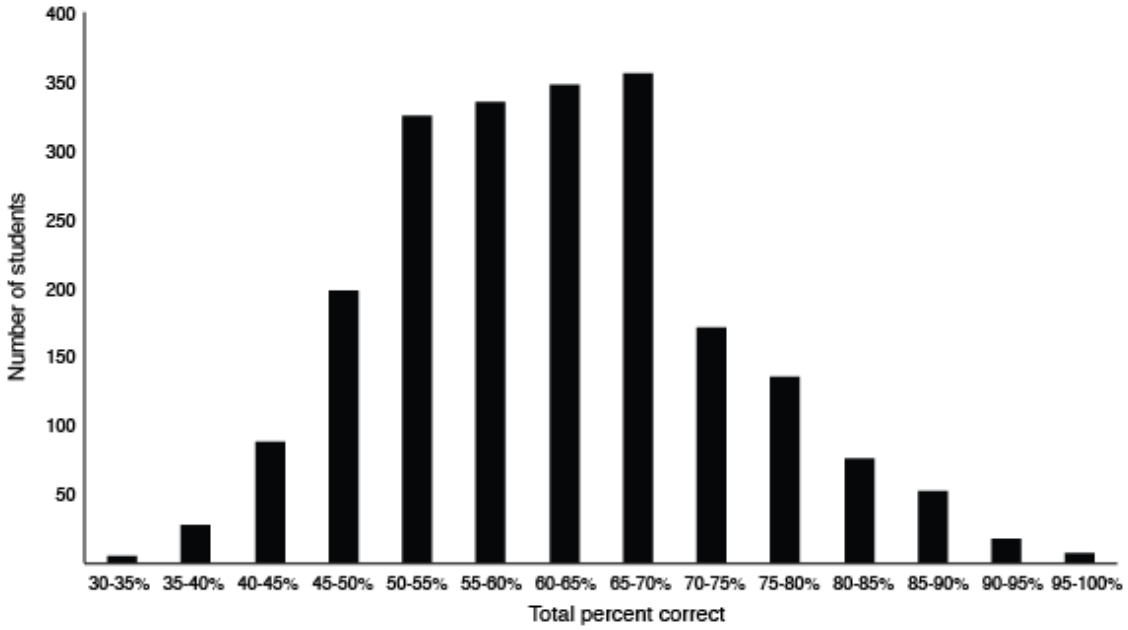

**SUPPLEMENTAL FIGURE S2.** Example of EcoEvo-MAPS automatically-generated score report for a single administration. (A) Distribution of percent correct for the overall assessment, *Vision & Change* core concepts, and ecology and evolution themes. Central bars represent course median scores, boxes represent inner quartiles, and whiskers represent minimum/maximum scores. (B) Percent correct and student thinking for two likely/unlikely statements within the ecology and evolution theme “heritable variation.” The score report provides percent correct for all 63 likely/unlikely statements along with associated student thinking.

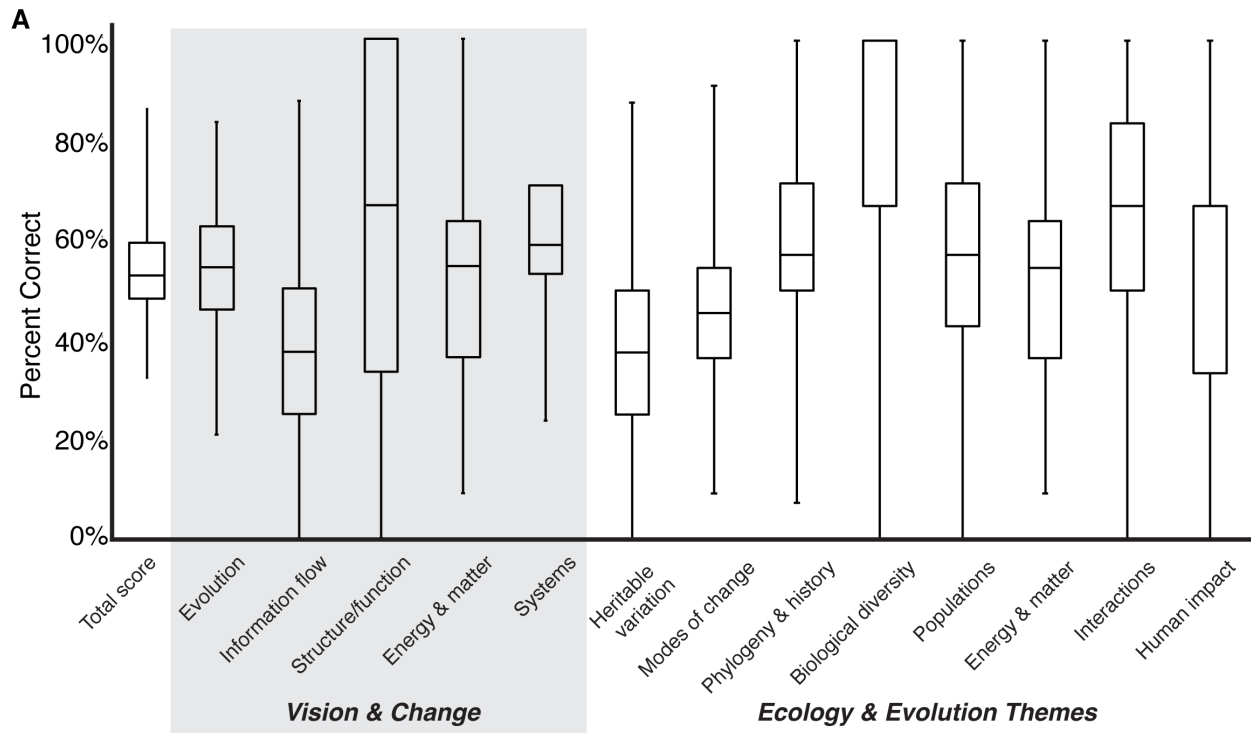

**B**

| Topic              | Percent correct | Example of correct student thinking                                                                        | Example of incorrect student thinking                                                                     |
|--------------------|-----------------|------------------------------------------------------------------------------------------------------------|-----------------------------------------------------------------------------------------------------------|
| Inheritance        | 39%             | <i>Not all mutations can be passed down, only those in germ cells.</i>                                     | <i>All mutations would be passed down; at least 1/4 offspring would have the mutation.</i>                |
| Genotype/phenotype | 63%             | <i>All appendages have the same DNA, it is expression, the gene is there, it just is turned on or off.</i> | <i>Different segments are caused by different DNA sequences. If DNA is the same, then same appendage.</i> |

**SUPPLEMENTAL TABLE S1.** The number of questions in each category in the final version of EcoEvo-MAPS.

| <b>Concepts</b>                         | <b>No. statements</b> |
|-----------------------------------------|-----------------------|
| Ecology                                 | 30                    |
| Evolution                               | 33                    |
| <i>Vision and Change</i>                |                       |
| 1. Evolution                            | 24                    |
| 2. Information flow                     | 8                     |
| 3. Structure function                   | 3                     |
| 4. Transformations of energy and matter | 11                    |
| 5. Systems                              | 17                    |
| <i>Ecology and Evolution</i>            |                       |
| 1. Heritable variation                  | 8                     |
| 2. Modes of change                      | 11                    |
| 3. Phylogeny and evolutionary history   | 14                    |
| 4. Biological diversity                 | 3                     |
| 5. Populations                          | 7                     |
| 6. Energy and matter                    | 11                    |
| 7. Interactions within ecosystems       | 6                     |
| 8. Human impact                         | 3                     |

**SUPPLEMENTAL TABLE S2.** Demographics of students who participated in “think-aloud” interviews. N=86.

| Gender                          | Number | Percentage of Total |
|---------------------------------|--------|---------------------|
| Female                          | 61     | 71%                 |
| Male                            | 24     | 28%                 |
|                                 | 75     |                     |
| English as a second language    | 8      | 9%                  |
| Transfer students               | 9      | 10%                 |
| First generation college status | 18     | 21%                 |
| Class standing                  | Number | Percentage          |
| First-year                      | 30     | 35%                 |
| Sophomore                       | 15     | 17%                 |
| Junior                          | 24     | 28%                 |
| Senior                          | 17     | 20%                 |
| Estimated GPA                   | Number | Percentage          |
| A                               | 38     | 44%                 |
| B                               | 35     | 41%                 |
| C                               | 10     | 12%                 |
| D                               | 3      | 3%                  |
| Ethnicity                       | Number | Percentage          |
| Asian/Asian American            | 7      | 8%                  |
| Caucasian/White                 | 62     | 72%                 |
| Filipino                        | 1      | 1%                  |
| Hispanic/Latino                 | 6      | 7%                  |
| Native American/Alaska Native   | 0      | 0%                  |
| African American/Black          | 1      | 1%                  |
| Hawaiian Native                 | 0      | 0%                  |
| Pacific Islander                | 0      | 0%                  |
| Other                           | 2      | 2%                  |
| More than one                   | 4      | 5%                  |

**SUPPLEMENTAL TABLE S3.** Demographics of EcoEvo-MAPS student participants in final administration. N=2142.

| Gender                          | Number | Percentage of Total |
|---------------------------------|--------|---------------------|
| Female                          | 1367   | 64%                 |
| Male                            | 745    | 35%                 |
| Other                           | 12     | 1%                  |
| English as a second language    | 274    | 7%                  |
| Transfer students               | 317    | 15%                 |
| First-generation college status | 754    | 35%                 |
| Class standing                  | Number | Percentage          |
| First-year                      | 1023   | 48%                 |
| Sophomore                       | 467    | 22%                 |
| Junior                          | 339    | 16%                 |
| Senior                          | 313    | 15%                 |
| Estimated GPA                   | Number | Percentage          |
| A                               | 732    | 34%                 |
| B                               | 1156   | 54%                 |
| C                               | 172    | 8%                  |
| D                               | 6      | 0%                  |
| F                               | 10     | 0%                  |
| Ethnicity                       | Number | Percentage          |
| Asian/Asian American            | 291    | 14%                 |
| Caucasian/White                 | 1382   | 65%                 |
| Filipino                        | 20     | 1%                  |
| Hispanic/Latino                 | 144    | 7%                  |
| Native American/Alaska Native   | 12     | 1%                  |
| African American/Black          | 63     | 3%                  |
| Hawaiian Native                 | 0      | 0%                  |
| Pacific Islander                | 0      | 0%                  |
| Other                           | 68     | 3%                  |
| More than one                   | 142    | 7%                  |

**SUPPLEMENTAL TABLE S4.** Faculty responses to survey on question accuracy and clarity for final version of the assessment. N=11.

| <b>Question</b> | <b>Percent Agreement: <i>Is this question:</i></b> |               |
|-----------------|----------------------------------------------------|---------------|
|                 | <i>scientifically accurate?</i>                    | <i>clear?</i> |
| 1               | 100%                                               | 100%          |
| 2               | 91%                                                | 82%           |
| 3               | 100%                                               | 100%          |
| 4               | 100%                                               | 90%           |
| 5               | 100%                                               | 100%          |
| 6               | 100%                                               | 90%           |
| 7               | 100%                                               | 82%           |
| 8               | 100%                                               | 100%          |
| 9               | 100%                                               | 91%           |

**SUPPLEMENTAL TABLE S5.** Examples of the most common thinking encountered during think-aloud student interviews for the final version of the assessment.

| Learning Target                                   | Learning Outcome                                                                                                                 | Example of Correct Student Thinking                                                                                                      | Example of Incorrect Student Thinking                                                                                                                          | Percent Correct | Question-Statement Number(s) |
|---------------------------------------------------|----------------------------------------------------------------------------------------------------------------------------------|------------------------------------------------------------------------------------------------------------------------------------------|----------------------------------------------------------------------------------------------------------------------------------------------------------------|-----------------|------------------------------|
| <b>Heritable variation</b>                        |                                                                                                                                  |                                                                                                                                          |                                                                                                                                                                |                 |                              |
| Inheritance                                       | Offspring only inherit DNA from the germ cells.                                                                                  | Not all mutations are passed down, only the ones in the germ cells.                                                                      | All mutations would be passed down. At least one out of four would have the mutation.                                                                          | 64%<br>53%      | 2-4<br>5-6                   |
| Genotype versus phenotype (i.e., gene expression) | Cells within an individual contain the same DNA.                                                                                 | All appendages have the same DNA, the gene is there, it is just turned on or off (i.e., expression).                                     | Different segments caused by different DNA sequences. If DNA is the same, then same appendage.//Temperature must change DNA sequences to have different sexes. | 59%<br>63%      | 2-1<br>5-4                   |
| Allele frequencies                                | The frequency of alleles in a population can be summarized and calculated using the Hardy Weinberg equation ( $1=p^2+2pq+q^2$ ). | There are likely more carriers than the percent with phenotype.                                                                          | Students calculate 3:1, using a Punnett square.                                                                                                                | 40%             | 6-7                          |
| Variation                                         | Individuals within a population are genetically variable.                                                                        | Genome is all of the genes, so even though very isolated, the individuals are not clones of each other, so there will be some variation. | Two individuals from the same population will have the same genes, especially if they are isolated.                                                            | 37%             | 5-1                          |
| Mutation                                          | Not all mutations result in phenotypic change.                                                                                   | Could be a silent mutations, where there is a change in the sequence of mRNA, but not the proteins that arise from translation.          | If mutation occurring, most likely phenotypic impact. There is no way that the mutation wouldn't since that is all that that gene controls.                    | 37%             | 2-6                          |



|                                     |                                                                                                                                                                             |                                                                                                                                                                                                                                                                              |                                                                                                                                                                                                                                                                                                                |                   |                   |
|-------------------------------------|-----------------------------------------------------------------------------------------------------------------------------------------------------------------------------|------------------------------------------------------------------------------------------------------------------------------------------------------------------------------------------------------------------------------------------------------------------------------|----------------------------------------------------------------------------------------------------------------------------------------------------------------------------------------------------------------------------------------------------------------------------------------------------------------|-------------------|-------------------|
| Dominance                           | Dominant and recessive refer to relative expression, not the frequency of an allele in a population.                                                                        | The most common traits can be recessive. Unless looking at gene itself and how it is expressing, cannot determine if dominate or recessive.                                                                                                                                  | If most have a certain trait, most likely because it is dominant.                                                                                                                                                                                                                                              | 28%               | 2-5               |
| <b>Modes of change</b>              |                                                                                                                                                                             |                                                                                                                                                                                                                                                                              |                                                                                                                                                                                                                                                                                                                |                   |                   |
| Fitness                             | Fitness is determined by reproductive success.                                                                                                                              | Species having 2 and 3 both co-existing, not filtered out by evolution. Phylogenetic tree doesn't show fitness, just relationships among species and their evolutionary history.<br>Even though one lived longer, equal fitness because both had 10 offspring.               | Three feeding appendages better than two, natural selection would prefer 3, evolved from 1 and 2; The more feeding appendages, the more feeding, which is better.//Not equal fitness, live to 100 had a lot more fitness.                                                                                      | 55%<br>48%        | 2-3<br>5-3        |
| Genetic drift                       | Genetic drift can only change the frequency of present alleles or decrease the number of alleles, it does not increase the possible number of alleles or genetic diversity. | In an isolated population it is not likely to have new allelic diversity occur, so should be stable or decrease.<br>Creating genetic diversity by artificial means, so less genetic drift.<br>Genetic drift is the loss of alleles, a new allele could result from mutation. | Drift is random, so it could either increase or decrease in diversity. Drift is not likely in an isolated population.<br>Genetic drift from outside sources, if from different islands would definitely create diversity. (i.e., genetic drift = gene flow).<br>If new allele appears, probably genetic drift. | 51%<br>40%<br>35% | 5-2<br>5-7<br>7-6 |
| Adaptation/<br>convergent evolution | Convergent evolution can produce similar phenotypes in distantly related organisms.                                                                                         | With similar temperature and rainfall, similar adaptations.                                                                                                                                                                                                                  | More likely to have the same phenotypes on the same continents.                                                                                                                                                                                                                                                | 74%               | 8-4               |
| Adaptation                          | To be considered an adaptation, a trait must meet certain criteria, such as having a function and being selected for.                                                       | The only information given is that these are two different phenotypes.                                                                                                                                                                                                       | Any difference in number of appendages can be assumed to be an adaptation.                                                                                                                                                                                                                                     | 74%               | 2-8               |

|                                           |                                                                                                                                                                                                             |                                                                                                                                                                                                                                                                                                              |                                                                                                                     |     |     |
|-------------------------------------------|-------------------------------------------------------------------------------------------------------------------------------------------------------------------------------------------------------------|--------------------------------------------------------------------------------------------------------------------------------------------------------------------------------------------------------------------------------------------------------------------------------------------------------------|---------------------------------------------------------------------------------------------------------------------|-----|-----|
| Gene flow/Species                         | Evidence of reproduction between individuals is one way to delimit a species.                                                                                                                               | If interbreeding, they are likely the same species.                                                                                                                                                                                                                                                          | Presence at different locations means that they are different species.                                              | 69% | 7-5 |
| Differential reproduction                 | Not all individuals in a population reproduce/pass on their genetic information.                                                                                                                            | Some individuals might not survive to reproduce or their offspring could die, but the ones that do reproduce will contribute genetic information to the next generation.                                                                                                                                     | All individuals have the opportunity and means to reproduce.                                                        | 65% | 6-6 |
| Gene flow                                 | Gene flow can result in new allelic variation entering a population.                                                                                                                                        | If other larvae come, slow local adaptation; bring in alleles special location starting to get rid of.                                                                                                                                                                                                       | Unsure how gene flow and local adaptation relate to one another.                                                    | 56% | 7-4 |
| Mutation/Natural selection                | Mutations generate new phenotypes and natural selection increases and/or decreases the frequencies of phenotypes.                                                                                           | Mutations generate new phenotypes. Natural selection eliminates phenotypes.                                                                                                                                                                                                                                  | A phenotype cannot be eliminated by natural selection.                                                              | 55% | 2-7 |
| <b>Phylogeny and evolutionary history</b> |                                                                                                                                                                                                             |                                                                                                                                                                                                                                                                                                              |                                                                                                                     |     |     |
| Common ancestry                           | All life shares common ancestry.                                                                                                                                                                            | All life goes back to common ancestor.                                                                                                                                                                                                                                                                       | Very different, so most likely                                                                                      | 49% | 4-5 |
|                                           |                                                                                                                                                                                                             |                                                                                                                                                                                                                                                                                                              | different ancestors.                                                                                                | 85% | 4-6 |
| Tree-reading                              | Relatedness is shown by common ancestors, represented as nodes, on a phylogenetic tree. Reading from top to bottom or left to right does not indicate evolutionary timing, relatedness, or trait evolution. | Species with one and two feeding appendages from same common ancestor, so there is more than one possible evolutionary scenario. Humans and chimps have more recent common ancestor. Howler monkey and marmosets share a more recent common ancestor. Most common ancestor likely had three color receptors. | The tree shows that first one, then two, then three feeding appendages evolved. (i.e., reading from top to bottom). | 46% | 2-2 |
|                                           |                                                                                                                                                                                                             |                                                                                                                                                                                                                                                                                                              | Humans branched off further away. They are equally related.                                                         | 75% | 6-1 |
|                                           |                                                                                                                                                                                                             |                                                                                                                                                                                                                                                                                                              |                                                                                                                     | 86% | 6-3 |
|                                           |                                                                                                                                                                                                             |                                                                                                                                                                                                                                                                                                              |                                                                                                                     | 76% | 6-4 |

|                    |                                                                                                                                                     |                                                                                                                                                            |                                                                                                                                                                                                  |     |     |
|--------------------|-----------------------------------------------------------------------------------------------------------------------------------------------------|------------------------------------------------------------------------------------------------------------------------------------------------------------|--------------------------------------------------------------------------------------------------------------------------------------------------------------------------------------------------|-----|-----|
| Tree-reading       | Extant species evolved from common ancestors, not from each other.                                                                                  | Marmoset and mice share a common ancestor, marmosets do not stem from mice directly.                                                                       | One branch from mice, also means humans evolved from mice.                                                                                                                                       | 66% | 6-2 |
| Tree-reading       | Relatedness is shown by common ancestors, represented as nodes, on a phylogenetic tree. The shape of the tree does not determine the relationships. | The relationships are the same.                                                                                                                            | The trees have different shapes, so they show different relationships.                                                                                                                           | 65% | 6-5 |
| Extinction         | Evidence of a mass extinction includes a decrease in biodiversity (i.e., increase in extinction rates) exceeding typical background levels.         | Dramatic drop in the amount of genera suggests an extinction that wiped out a lot of diversity.                                                            | A mass extinction means that no species would be present, something happened here but did not cause them to go extinct. Because decrease happens multiple times, could not be a mass extinction. | 74% | 4-2 |
| Taxonomic rankings | Each species belongs to a genus.                                                                                                                    | Most likely larger amount of species than genera, species more specific.                                                                                   | Species more specific, so number of species would be smaller than genera.                                                                                                                        | 65% | 4-1 |
| Deep time          | Humans have only been present for a very short time in the history of life.                                                                         | Humans were not around for most of earth history and previous mass extinctions, but humans have increased the rate of extinction by a few hundred percent. | Humans have caused most extinctions.                                                                                                                                                             | 63% | 4-7 |

|               |                                                                                                                                 |                                                                                                                                                |                                                                                          |     |     |
|---------------|---------------------------------------------------------------------------------------------------------------------------------|------------------------------------------------------------------------------------------------------------------------------------------------|------------------------------------------------------------------------------------------|-----|-----|
| Symbiosis     | Endosymbiosis has resulted in major events in evolutionary history and important structures like chloroplasts and mitochondria. | The endosymbiont theory of mitochondria and chloroplasts, have own DNA and ribosomes.                                                          | Chloroplasts are not their own life form, they are part of the plant for photosynthesis. | 61% | 9-3 |
| Fossilization | The chance of fossilization is higher for organisms with hard compared to only soft body parts.                                 | Easier for harder materials to become fossilized.                                                                                              | Hard shell is a beneficial adaptation, so more likely to survive.                        | 60% | 4-3 |
| Extinction    | Most of what has ever lived on earth is now extinct.                                                                            | Species go extinct all the time, so rapidly and often, now cannot compare to the entirety of earth being here. 99% of all species are extinct. | More species are alive now than were in the past.                                        | 53% | 4-4 |

### Biological diversity

|                     |                                                                                                                               |                                                                 |                                                                                                                              |     |     |
|---------------------|-------------------------------------------------------------------------------------------------------------------------------|-----------------------------------------------------------------|------------------------------------------------------------------------------------------------------------------------------|-----|-----|
| Biomes              | In general, climate varies by latitude.                                                                                       | Sites with similar latitude likely have similar climates.       | Sites that are closer together (within the same hemisphere) have more similar climates.                                      | 90% | 8-1 |
| Species diversity   | A graph can be interpreted to determine the number of species. One measure of diversity is the number of species.             | Interpret graph to see change in number of species from 3 to 6. | Incorrectly interpret graph to mean that there are the same number of species and only their relative abundance has changed. | 81% | 9-1 |
| Biodiversity trends | In general, species diversity is highest nearest the equator and decreases toward the poles (latitudinal diversity gradient). | In general, species diversity increases toward the equator.     | There is more variability at higher latitudes, so there is more diversity there.                                             | 66% | 8-3 |

### Populations

|                               |                                                                                                                               |                                                                                                                                                                                                                                   |                                                                                                          |            |            |
|-------------------------------|-------------------------------------------------------------------------------------------------------------------------------|-----------------------------------------------------------------------------------------------------------------------------------------------------------------------------------------------------------------------------------|----------------------------------------------------------------------------------------------------------|------------|------------|
| Reproduction/<br>life history | There is a life-history trade-off between number of offspring and survivorship.                                               | Organisms with higher number of offspring typically have lower survivorship.                                                                                                                                                      | If young are cared for more, there is greater reproduction.                                              | 79%        | 7-7        |
| Intraspecific competition     | Intraspecific competition increases as the population size increases.                                                         | When there are more bacteria in the flask, they compete more with each other for resources and space.                                                                                                                             | There is more competition only where there are more of another species.                                  | 63%        | 3-1        |
| Density                       | Density (one measurement of population size) is the number of individuals per unit volume or area.                            | Density is measured and shown in the figure.                                                                                                                                                                                      | More information is required in order to calculate density.                                              | 61%        | 3-2        |
| Population growth/decline     | Carrying capacity is the maximum population size a particular habitat can sustain and is influenced by regulating mechanisms. | If at carrying capacity because of limited phosphorous - need addition of phosphorous for population to increase.                                                                                                                 | If more nitrogen, more growth because nitrogen and phosphorous cancel out.                               | 59%        | 1-6        |
| Population growth/decline     | Populations that grow without limitation follow an exponential growth pattern.                                                | Would more likely grow exponentially while unlimited food and resources.                                                                                                                                                          | There is nothing to make the population decrease, so probably linear growth.                             | 55%        | 3-5        |
| Population growth/decline     | Population size is dependent on many factors.                                                                                 | The population size is dependent on many factors in addition to predation - water, temperature, resources, competition, amount of sunlight, disease, changes in pH, habitat space, birth/death rates, environmental factors, etc. | Only one organism is shown in the food web to eat phytoplankton, which is the only regulating mechanism. | 53%        | 1-3        |
| <b>Energy and matter</b>      |                                                                                                                               |                                                                                                                                                                                                                                   |                                                                                                          |            |            |
| Primary production            | In general, yearly primary productivity is higher and more regular near the equator                                           | The most amount of sunlight is near the equator, so this area would have the highest                                                                                                                                              | Higher temperatures and greater rainfall results in greater variability in productivity.                 | 78%<br>65% | 8-2<br>8-5 |

|                    |                                                                                                                                        |                                                                                                   |                                                                                             |     |     |
|--------------------|----------------------------------------------------------------------------------------------------------------------------------------|---------------------------------------------------------------------------------------------------|---------------------------------------------------------------------------------------------|-----|-----|
|                    | and lower and more varied near the poles.                                                                                              | photosynthesis/productivity. Where winter occurs there is less photosynthesis.                    |                                                                                             |     |     |
| Energy & matter    | Decomposition recycles matter, and in doing so provides nutrients to plants, but not energy (plants obtain their energy from the sun). | Decomposition provides nutrients, but the main driver of photosynthesis is the sun.               | Energy is created through decomposition, dead plants had energy and it has to go somewhere. | 76% | 9-6 |
| Primary production | Primary producers provide accessible energy to other organisms.                                                                        | The energy is converted by chemosynthetic organisms.                                              | All organisms would be able to use some form of energy in the environment.                  | 74% | 7-3 |
| Energy & matter    | Energy transfer is inefficient.                                                                                                        | Energy is lost as it transfers between levels in a food web.                                      | If prey increase, predators increase.                                                       | 68% | 1-4 |
| Energy & matter    | The total amount of matter is fixed in global cycles - it moves from one reservoir to another and cannot be created or destroyed.      | Carbon is never removed; it can be moved to another location or recycled, but stays in the cycle. | Soil erosion and decomposition removes carbon.                                              | 60% | 9-5 |
| Energy & matter    | Matter cannot be created or destroyed (by biological organisms).                                                                       | When fungi eat they do not destroy atoms, they break down compounds.                              | As decomposers, fungi destroy atoms.                                                        | 60% | 9-7 |

|                 |                                                                                                       |                                                                                                                                                                                                                                                      |                                                                                                                                                                                                                                                                                             |     |     |
|-----------------|-------------------------------------------------------------------------------------------------------|------------------------------------------------------------------------------------------------------------------------------------------------------------------------------------------------------------------------------------------------------|---------------------------------------------------------------------------------------------------------------------------------------------------------------------------------------------------------------------------------------------------------------------------------------------|-----|-----|
| Energy & matter | When a toxicant biomagnifies, it is found at a higher concentration at higher levels of the food web. | In biomagnification, a toxicant increases and concentrates higher up in the food chain because those organisms are consuming more of the toxicant. Bull trout are at a higher trophic level than whitefish and therefore more would accumulate more. | A toxicant is diluted as it is consumed, so higher trophic levels will have a lower concentration. Whitefish are directly eating toxicant. The toxicant is digested twice before the bull trout, so although the bull trout still receives the toxicant, it is diluted because less direct. | 44% | 1-5 |
| Energy & matter | Fertilizers provide nutrients, but not energy, for photosynthesis.                                    | Fertilizers are a source of nutrients and the sun is the source for energy in photosynthesis.                                                                                                                                                        | Any of the main elements, (P, K, N) are direct sources of energy.                                                                                                                                                                                                                           | 43% | 8-7 |
| Energy & matter | The source of carbon in plants is the atmosphere, not soil.                                           | Carbon is taken in from the atmosphere, while nutrients and vitamins are from the soil.                                                                                                                                                              | Plants take up carbon from the soil and use to respire oxygen.                                                                                                                                                                                                                              | 37% | 9-4 |
| Energy & matter | Carbon dioxide does not provide energy for biological processes.                                      | Energy for photosynthesis comes from light (the sun). Energy for chemosynthesis comes from chemicals.                                                                                                                                                | Carbon dioxide is required for both photosynthesis and chemosynthesis and is used as the source of energy because otherwise neither process would occur.                                                                                                                                    | 27% | 7-2 |

### Interactions within ecosystems

|                                       |                                                                                     |                                                            |                                                                                                            |     |     |
|---------------------------------------|-------------------------------------------------------------------------------------|------------------------------------------------------------|------------------------------------------------------------------------------------------------------------|-----|-----|
| Population growth/decline / Predation | Organisms do not limit their consumption to leave resources for future generations. | The population can go extinct if it runs out of resources. | Organism is looking out for itself as well, wouldn't try to deplete source of food population because then | 68% | 3-3 |
|                                       |                                                                                     |                                                            | nothing to live off of.                                                                                    | 73% | 3-4 |

|                           |                                                                                                                                         |                                                                                                                                      |                                                                                                   |     |     |
|---------------------------|-----------------------------------------------------------------------------------------------------------------------------------------|--------------------------------------------------------------------------------------------------------------------------------------|---------------------------------------------------------------------------------------------------|-----|-----|
| Symbiosis                 | Symbioses can be classified depending on the effect of the interaction on both partners - from parasitism to commensalism to mutualism. | Both partners are benefitting, so closer to mutualism - the worm benefits from chemosynthesis and the bacteria have a place to live. | N/A                                                                                               | 89% | 7-1 |
| Predation                 | An increase in the population size of a predator likely leads to a decrease in the population size of prey.                             | An increase in predator population leads to a decrease in prey population.                                                           | N/A                                                                                               | 80% | 1-7 |
| Interspecific competition | Organisms that consume the same resource will be affected by interspecific competition.                                                 | Since both consume zooplankton, competition is likely to have had an effect.                                                         | Salmon declined because their food resource declined, not because of competition.                 | 77% | 1-2 |
| Succession                | Organisms that colonize later experience more competition for space and resources than those that colonize first.                       | In year 1, not as many to compete with, in year 15, more species, more competition for space.                                        | Plants that colonize first grow faster and are likely better competitors for space and resources. | 73% | 9-2 |
| Predation                 | Arrows in a food web show the organisms that are consumed.                                                                              | Bull trout directly feed on whitefish and salmon (where the arrows point).                                                           | Bull trout consume all of the other organisms.                                                    | 72% | 1-1 |



---

**Human impact**

---

|               |                                                                                                   |                                                                                                                                                                                                                                    |                                                                                                             |     |     |
|---------------|---------------------------------------------------------------------------------------------------|------------------------------------------------------------------------------------------------------------------------------------------------------------------------------------------------------------------------------------|-------------------------------------------------------------------------------------------------------------|-----|-----|
| Global change | Mass deforestation has global implications.                                                       | Mass deforestation could change global climate because if less forest, more CO2 in air.                                                                                                                                            | Mass deforestation will only have an effect on that area, not globally.                                     | 84% | 8-6 |
| Conservation  | Conservation efforts will affect species differently depending on their ecology and life history. | No guarantee that all are equally protected because: some species easier to harvest, some types favored over others and harvested more, different population sizes, or there could be more of one species in area where harvested. | These crustaceans are close enough to being the same species that a federal limit will protect all of them. | 61% | 2-9 |
| Conservation  | Population growth models require information about birth and death rates.                         | Need to look at many factors - predation, food, habitat, environmental disaster, death rates, disease - to make accurate population predictions.                                                                                   | If know hatch rates about to see changes in population size if growing or decreasing in size.               | 53% | 5-5 |

---

**SUPPLEMENTAL TABLE S6.** Summary of differential item functioning (DIF) analyses for the 63 likely/unlikely statements (i.e., items) on the final version of EcoEvo-MAPS.

|                                 | No. of statistically significant DIF items | Range of effect sizes | No. of non-negligible DIF items |
|---------------------------------|--------------------------------------------|-----------------------|---------------------------------|
| Gender                          | 16                                         | 0.0001 – 0.0086       | 0                               |
| English as a second language    | 11                                         | 0.0000 – 0.0086       | 0                               |
| Transfer student status         | 7                                          | 0.0000 – 0.0048       | 0                               |
| First generation college status | 9                                          | 0.0000 – 0.0082       | 0                               |
| Ethnicity                       | 11                                         | 0.0000 – 0.0073       | 0                               |
